# Supplementary material for: CD11b deficiency suppresses intestinal tumor growth by reducing myeloid cell recruitment
Source: PubMed Central journal article supplement (PMC4630647; doi:10.1038/srep15948), 2015-11-03
Supplement: srep15948-s1.pdf [file srep15948-s1.pdf]

**Title: CD11b deficiency suppresses intestinal tumor growth by reducing myeloid cell recruitment**

**Authors and affiliation:**

Qian-Qian Zhang<sup>1†</sup>, Xi-Wen Hu<sup>1†</sup>, Yi-Long Liu<sup>1</sup>, Zhi-Jin Ye<sup>1</sup>, Yi-He Gui<sup>1</sup>, Da-Lei Zhou<sup>1</sup>, Cui-Ling Qi<sup>1</sup>, Xiao-Dong He<sup>1</sup>, Honglin Wang<sup>2\*</sup>, Li-Jing Wang<sup>1\*</sup>

1. Vascular Biology Research Institute, Guangdong Pharmaceutical University, Guangzhou 510006, China
2. Institute of Immunology, Institute of Medical Sciences, Shanghai Jiao Tong University School of Medicine, Shanghai 200025, China

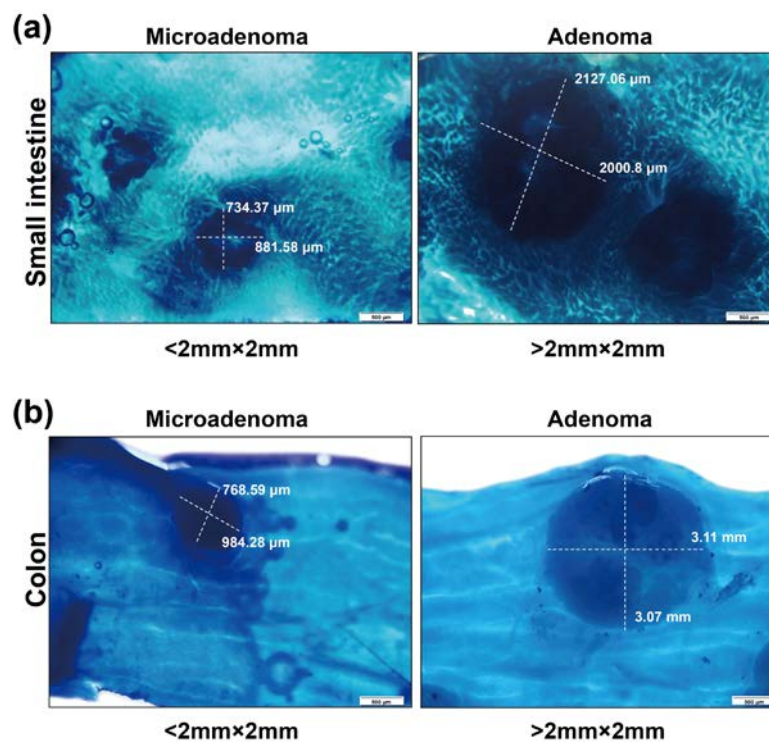

**Supplementary Figure 1. Classification of intestinal tumor.** The intestinal (A) and colonic (B) tumors were classified into 2 types: microadenomas and adenomas. Microadenomas were defined as on greater than 2 mm × 2 mm in size, and the adenomas were greater than 2 mm × 2 mm in size detected under microscope.

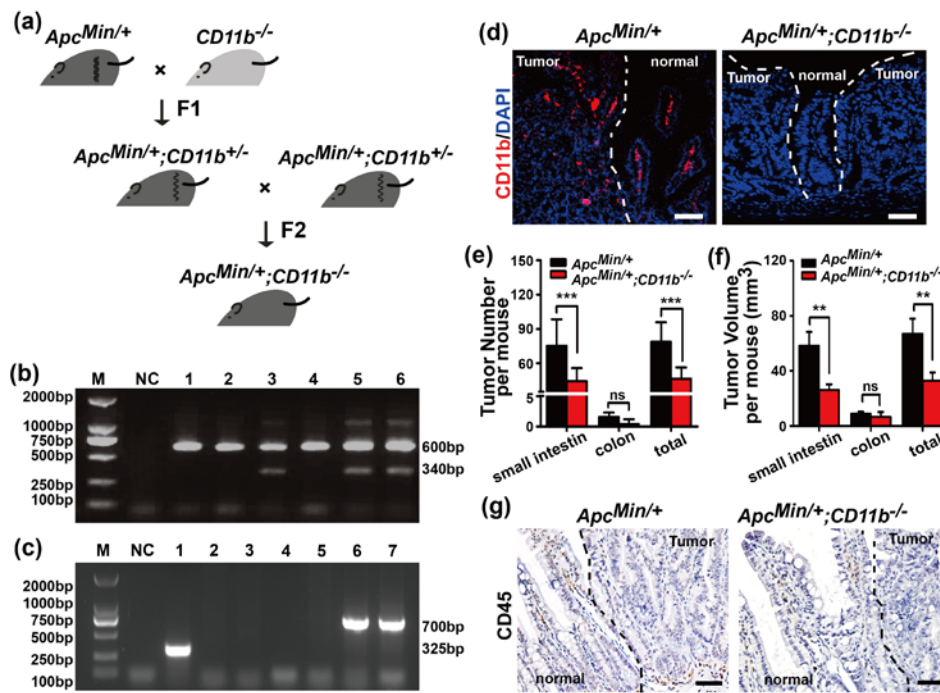

**Supplementary Figure 2. Construction of Slit2-overexpressing mice.** A schematic diagram of generating  $Apc^{Min/+};CD11b^{-/-}$  experimental mice carrying both the  $CD11b$  gene deficiency and  $Apc$  mutant allele is shown in panel A. PCR screening of  $Apc^{Min/+};CD11b^{-/-}$  mice using primers that detect both wild-type and mutant alleles of  $Apc$  (B,  $Apc$  wild-type and mutant alleles, 619 bp and 331 bp;  $Apc$  wild-type allele, 619 bp), and both wild-type and deficiency alleles of  $CD11b$  (C,  $CD11b$  wild-type allele, 325 bp;  $CD11b$  deficiency allele, 700 bp). M: molecular weight marker D2000; NC: negative control. The  $CD11b^{+}$  myeloid cells infiltrating was detected by IF in the tumor tissues and adjacent normal tissues of the  $Apc^{Min/+}$  mice and  $Apc^{Min/+};CD11b^{-/-}$  mice (D).  $CD11b$  deficiency significantly inhibited the number (E) and size (F) of the tumors in small intestine but not colon in the  $Apc^{Min/+}$  mice. The  $CD45^{+}$  leukocytes infiltration were suppressed in the tumor sites, but were not inhibited in the adjacent normal tissues from the  $Apc^{Min/+};CD11b^{-/-}$  mice compared with the  $Apc^{Min/+}$  mice (G). Scale bars: 100  $\mu$ m. All the drawings in figure (a) were drawn by Q.Q.Z. using

CoreIDRAW.

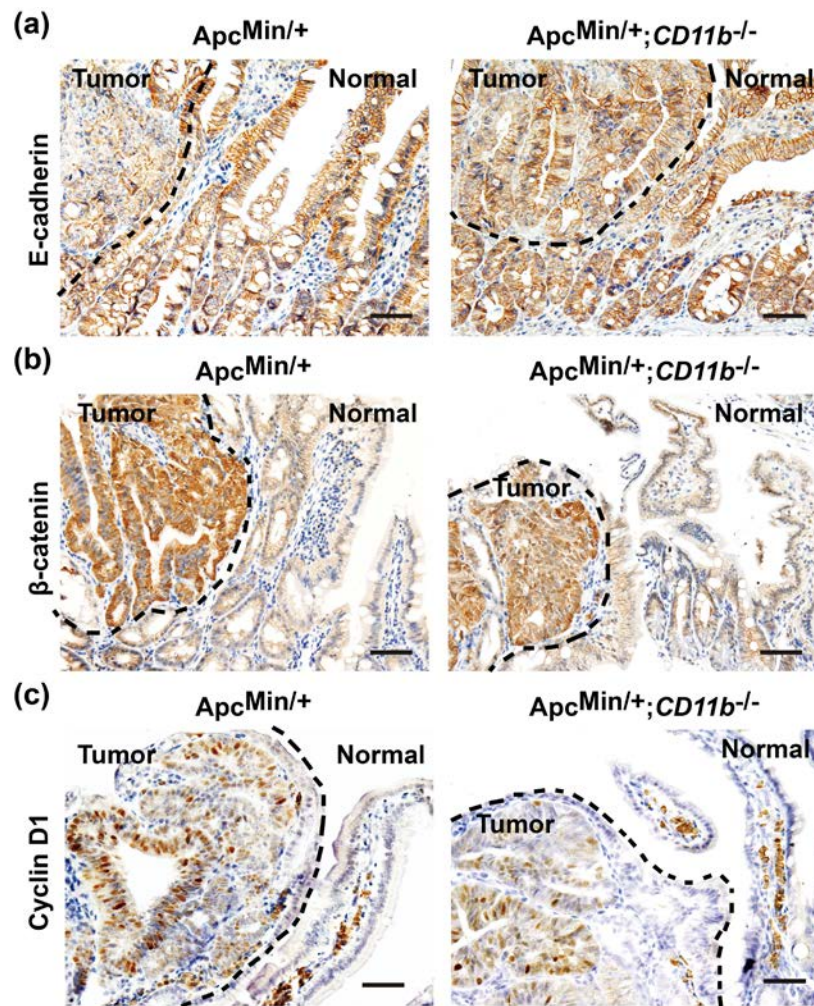

**Supplementary Figure 3. CD11b deficiency inactivated the Wnt/β-catenin pathway in tumor tissues.** The expression of E-cadherin (A), β-catenin (B) and cyclin D1 (C) was examined in the tumor tissues and adjacent normal tissues of the *Apc<sup>Min/+</sup>* mice and *Apc<sup>Min/+</sup>;CD11b<sup>-/-</sup>* mice by IHC. Scale bars: 100 μm.

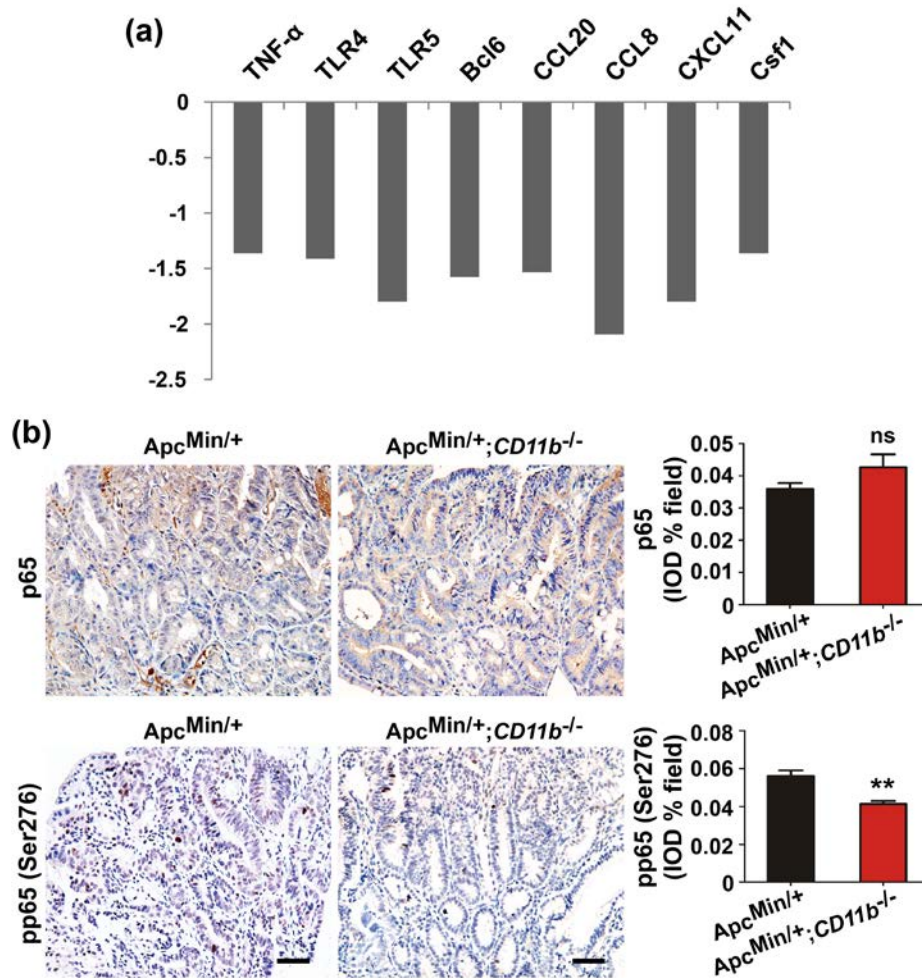

**Supplementary Figure 4. The differential expression cytokines and NF- $\kappa$ B signaling may affected by CD11b<sup>+</sup> myeloid cells.** Total RNA was extracted from spleen, and cytokines that were potentially regulated by CD11b<sup>+</sup> myeloid cells were identified by qRT-PCR array. The histogram shows the cytokines with more than two-fold change in spleen (A). The expression of p65 and pp65 (Ser276) in tumor tissues of the *Apc<sup>Min/+</sup>* mice and *Apc<sup>Min/+</sup>;CD11b<sup>-/-</sup>* mice was detected by IHC (B). The results of are representative of 11 independent mice (all mice were 16 –weeks -old). The statistical data are expressed as the mean  $\pm$  S.D.. ns:  $P > 0.05$ , \*\*:  $P < 0.01$ . Scale bars: 50  $\mu$ m.

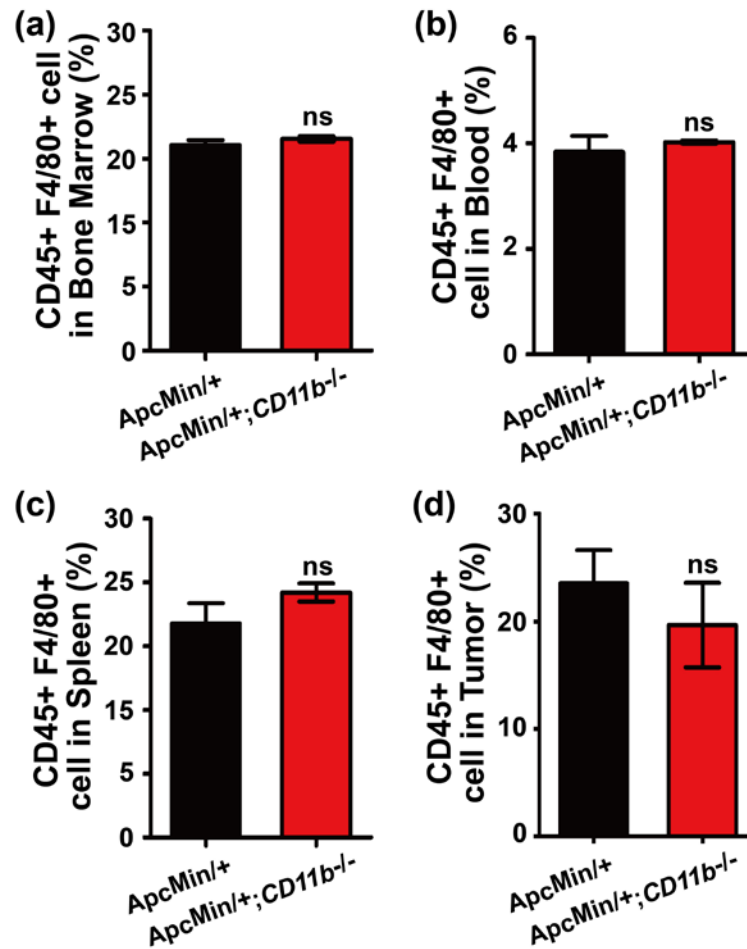

**Supplementary Figure 5. CD11b deficiency did not affect macrophage recruitment in the tumor environment.** The number of the macrophage (gated on CD45<sup>+</sup> cells) in the bone marrow (A), blood (B), spleen (C) and tumor tissues (D) of the *Apc<sup>Min/+</sup>* mice and *Apc<sup>Min/+</sup>;CD11b<sup>-/-</sup>* mice was measured by FACS. The results represent of 11 independent mice (all mice were 16 –weeks -old). The statistical data are expressed as the means  $\pm$  S.D.. ns:  $P > 0.05$ .
